# Supplementary material for: Locus- and domain-dependent control of DNA methylation at mouse B1 retrotransposons during male germ cell development
Source: HighWire-hosted journal article supplement (doi:10.1101/gr.123679.111), 2011-10-31
Supplement: Supplementary_Tables.xlsx [file Supplementary_Tables.xlsx]

## Sheet: Table S1
Supplementary Table S1. Genomic positions of B1 loci and PCR primers for the analysis of their methylation
B1 ID	location (NCBI build36)	orientation	primer sequence (F)	primer sequence (R)	PCR length	amplicon sequence (nonCG-cytosines are converted into t)	B1 region in amplicon
B1_001	chr1:9689294-9689434	-	TTGATAGTTGGGTATGTTTTAAGGTAGTT	CACAATCATTTCCATAAAAAAATTCTAAT	248	TTGATAGtTGGGTATGttttAAGGTAGtTGTAAATAAAtATAAAAAAAAAATtTttTtATGGAGtCGGGCGTGGTGGCGtACGttTTTAATtttAGtAtTCGGGAGGtAGAGGtAGGCGGATTTtTGAGTTCGAGGttAGttTGGTtTAtAAAGTGAGTTttAGGAtAGttAGGGtTAtAtAGAGAAAtttTGTtTCGAAAAtTGAAAttAAAAttAAAAttAGAATtTttTtATGGAAATGATTGTG	63-202
B1_002	chr1:10298307-10298452	+	GTGGAATAAATATGAATTATATTATTGGTT	TACATCAATTCCCACAAAAATTTAC	267	GTGGAAtAAATATGAAttATAtTATTGGtTAGTTTATtAGAttATTTAAGAAGTtTGAATTGGtCGGGCGTGGTGGCGtACGttTTTAATtttAGtAtTCGGGAGGtAGAGGtAGGTGGATtTtTGAGTTCGAGGttAGttTGGTtTAtAAAGTGAGTTttAGGAtAGttAAGGtTATACGGAGAAAtttTGTtTCGAAAAAtAAAAAATAAAATAAATAAAAAGAAGTtTGAATTGGGGtCGtAAAttTTTGTGGGAAtTGATGTA	63-207
B1_003	chr1:22321071-22321217	+	GTATGTTTTTTGTTATTTTTGTTGGTTTAT	AAAAAAATCCATACATTTAACATTATTAAA	384	GTATGTTTtTTGtTAtTTTTGTTGGTTtATTTTtTTTTGTTTTAtAGAAAGAGTAAAAAAAttAGAGGAGTGTGAGtAGAGAGGTGGGAGGAGAAATtATGATTAAAATATATTATATGAGAAtATTtTATTAAAAAtTTATGGGtCGGGCGTGGTGGCGtACGttTTTAATtttAGtAtTTGGGAGGtAGAGGtAGGCGGATTTtTGAGTTCGAGGttAGttTGGTtTACGGAGTGAGTTttAGGAtAGttAGGGtTAtAtAGAGAAAtttTGTtTtAAAAATAttAAAAAAAAAAAAAAAAAAAAAAAAAtTTATAAAAAGAtATGTGAAAAtAtTttAAGTTAAAGTTTAtTtTAATAATGTtAAATGTATGGAtTTTTtT	145-312
B1_004	chr1:193319736-193319886	+	TGGAAATTGATTTTTTAAAATATTAAATAA	AAACCACTTCCTCAAATACAATACTAC	357	TGGAAAtTGAtTTTTTAAAATAttAAATAAtTttATTAATGTGAGTTATtTTAGAATTTTAAGTTTGTTTGtATTTTAATTTAGTtTATTTTAAATTAtTTAAGAGAATTAAAtAAGtCGGGCGGTGATGGCGtAtACGttTTTAAtttCGGtAtTCGGGAGGtAGAGGtAGGCGGATTTtTGAGTTTtAGGttAGttTGGTtTAtAAAGTAAGTTttAGGAtAGTtAGGGtTAtAtAGAGAAAtttTGTtTCGAAAAAttAAAAATAAAAAAtAAAATTTAAAAGTTTttTAGAAGtAAAGCGAGAtttAGTGGAtATAAAtATtACGCGTAGtATTGtAttTGAGGAAGTGGTTT	116-265
B1_005	chr1:197034677-197034824	+	AGGGTAGTAATGAGATTAGTTGTTATGTAT	AACCAAAAAACACTTTCTTAATTTTT	277	AGGGtAGTAATGAGAtTAGTTGtTATGtATAtATttTttTGGttATTtATAATTTAGttAATGAAAATATTGTTGTTTtTAAGAAAGTGTtTTtTAGtCGTGCGTGGTCGTGtACGttTTTAATtttAGtAtTTGGGAGGtAGAGGtAGTCGGATTTtTGAGTTCGAGGTtAGttTTGTtTAtAAAGTGAGTTttAGGAtAGttAGGGtTATAtAGAGAAAtttTGTtTTAAAAAAAAAAAAAAAAAAAAAAAAAAtTAAGAAAGTGTtTTtTGGTt	96-256
B1_006	chr2:26856466-26856601	-	AAAGAGAATTAAGGTAGTGGTTTTTATT	AACTTATAATTTTAACTCTAACCCTAAACA	277	AAAGAGAAtTAAGGtAGTGGtTTttAtTCGATAAGtAATGAttATAAATAAAATtTTTTTTAAAAAAGAAATGTAGtCGGACGTGGTGGtACGttTTTAATtTtAAtttTCGGGAGGtAGAGGtAGGCGGATTTtTGAGTTCGAGGTtAAttTGGTtTAtAGAATGAGTTttAGGAtAGttAGGGtTAtAtAGAGAAAtttTGTtTtAAGttttTttAttttttttAAAAAAAGAATGTTATTTtTtTGtttAGGGttAGAGTtAAAATtATAAGtt	75-209
B1_007	chr2:112137834-112137980	-	GGAGTTAATATTGTAAGGTAGGGTGAATT	CTCTCTCTTTCAAACCCTTTCTAAACTATA	308	GGAGtTAAtATTGtAAGGTAGGGTGAAttTAttTAtAGAtTAGtTAtAAGGTtAAGAATAtAGTAAGAAGttAGGCGGTGGTGGCGtACGttTTTtATtttAGtAATCGGGAGGtAGAGGtAGGCGGATTTTGAGTTCGAGGttAGttTGGTtTAtAAAGTAAGTTttAGGAtAGttAGAGtTAtAtAGAGAAAtttTGTtTTGAAAAAttAAATAATAATTATAATAATAATAtAGtAAGAAAtATTGGGGAAAAAAATTAAAAtATTATtTAGTAAtAtAGTTtAGAAAGGGtTTGAAAGAGAGAG	69-214
B1_008	chr2:121883799-121883945	+	AGTATTGTTGTATTTAAAGGAGTTTAAAGG	TTAAATTAAAACTAAAAAAATTTAATTCCA	314	AGTAtTGTTGTAtTTAAAGGAGttTAAAGGTtATTTAATTTTGTAAATAAAAATGtTGAtATGAAtATAAGATTAAAAAAAAAAtTTAGGGtCGGGCGTGGTGGCGtACGttTTTAGTtttAGtAtTCGGGAGGtAGAGGtAGGCGGATTTtTGAGTTCGAGGttAGttTGGTtTAtAAAGTGAGTTttAGGAtAGttAGGGtTATAtAGAGAAAtttTGTtTtAAAAAAttAAAAAAAAAAAAAAAAAAAAAAtTTAGTTtATGTAAtTAGATATTAGTAttATGGAAttAAATTTTtTTAGttTtAAttTAA	91-237
B1_009	chr3:69015206-69015353	-	GATGTTATGGTGTGTGTTTGTTGTT	AACAACTCAATAAAAAATTTACTACAAATT	311	GATGtTATGGTGTGTGTtTGtTGtttAGAtTTGTAtTGtTTTTtAATAAtATGTTGTATTTTAtTAAAtTTGTAGATAAAAGTGTtTTTATGAGtCGGGCGTAGTGGtAtACGttTTTAATtttAAtAtTTTCGAGGtAGAGGtAGGtCGATTTtTGAGTTCGAGTttTGttTGGTTTAtAAAGTGAGTTttAAGAtAGttAGGAtTAtAtAGAGAAAtttTGTtTCGAAAAAAtAAAAAtAAAAAtAAAAtAAAAtAAtAAAtAAAAAAGTGTtTTTATAAATTTGTAGTAAATTTtTTAtTGAGtTGTt	93-270
B1_010	chr3:108494401-108494547	-	TTAGGAAGGTTAGTTAGAAGGATGGT	CACTAACTTTTCACACCCTCTTAAC	498	ttAGGAAGGTtAGTTAGAAGGATGGtTGATtAGtAtTGTAAGAGGtTAAAGtAAtATGGGAATATTTttAAGAAGGAGATGAtAAGAtAAttAAGTTtTTTtTttAAtTAGGAtttAAAAGtAtAAtTGTttAtTttTTAtttTAAAGAAGATttTTTGGTTTTTTTTTTTTTTTTTTTTTTTtTTTTTTTTTTTTTTCGAGAtAGGGTTTtTtTTTATAGtttTGGtTGTttTGGAAtTtAtTtTGTAGAttAGGtTGGttTCGAAtTtAGAAATTCGttTGttTtTGttTttCGAGTGtTGGGATTAAAGGCGTGCGttAttACGttCGGtttTAAAGAAGATttTAATGGAGtTGttTGAATGTCGAGAGtTGGTGGGTTTATGttATTGAGATAG…	161-333
B1_011	chr4:10968094-10968240	-	GGTATTTGTTAAGGGTTTTATGTTTTTGTT	AAAAACATTACTAAAAATACCATACATTTT	253	GGTATtTGTtAAGGGtTttATGTtTTTGTTAtAAtttAGATATGAGtCGGGCGTGGTGGCGtACGttTTTAATtttAGtATTCGAGAGGtAGAGGtAGGTGGATTTtTGAGTTTGAGGttAGttTGGTtTAtAAAGTGAGTTttAGGAtAGttAGGAtTAtAtAGAGAAAtttTGTtTCGGAAAAttAAAttAAAtAAAAtAAAAtAAAAAAtAAAtAAAtAAAAAATGTATGGTATtTTtAGtAATGttTtt	45-190
B1_012	chr4:48559503-48559649	-	TTGAGGATGTAATTAAAGGAAAATTATTA	AATACATCTCCTACTTACCCATACTTTACT	290	tTGAGGATGTAAttAAAGGAAAAtTATTAGtCGGGCGTGGTGGCGtACGttTTTAGTtttAGAAtTTGGGAGGtAGAGAtAGGtAGATTTtTGAGTTCGAGGttAGttTGATtTAtAAAGTAAGTTttAGGAtAGttAGGGtTATAtAGAGAAAttTTGTTTCGAAAAAtAAAAtAAAAtAAtAAtAAtAAAAAAtAAAAAGGAAAAtTATTGGAtTGAAATTTGAAGATtAATTTAGATTGGAAATTTGATTGATAGGTAGTAAAGTATGGGtAAGtAGGAGATGTAtt	29-174
B1_013	chr4:149397034-149397180	-	ATAGGGTGTTTAGAGGGTAGGTAGT	TTTTTAAACCCAAAAAAAATTTTT	271	AtAGGGTGtTtAGAGGGtAGGtAGTCGGAtATTGTGGtTtATGtAtTAAGATtTAATtTGtTAGtCGGGCGTGGTGGCGtACGttTTTAATtttAGtAtTTGGGAGGtAGGGtAGGCGGATTTtTGAGTTCGAGGttAGttTGGTtTAtAAAGTGAGTTttAGGACGGttAGGGtTAtAtAGAGAAAtttTGTtTtAAAAAGAAAAAAAAAAAAAAAAAGATtTAATtTGtTAAGAGtAGAAAAAAAAAAAATTtTtTtTGGGtTTAAAAA	63-208
B1_014	chr4:154946107-154946254	+	TATGTTGTTTTGGTAATGTTTTGGTT	ATATCAATCCCCTAAAAATTTAATAATACT	377	TATGTTGTTTTGGTAATGTTTTGGTTGGTGACGTTATTAAGATGGAGATAGTTTAGTCGGGTATGGTGGCGTACGGTTTTAATTTTAGTATTCGGGAGGTAGAGGTAGGTGGATTTTTGAGTTCGACGTTAGTTTGGTTTATAAAGTGAGTTTTAGGATAGTTAGGGTTATATAGAGAAATTTTGTTTCGAAAAATTAAAAAGATGGAGATAGTTATATAGTTTTTTTATTATTTTGTTTTGTGGTATTATTAAGATGTTAATAAATATGATTTTATTATTTTTTTGTATTATATGTTAATGTATTATATGGTATAAGTTAAAATCGTAGTATTTATAAAATTTTTTAGTATTATTAAATTTTTAGGGGATTGATAT	55-201
B1_015	chr5:17327336-17327479	-	AAAGGTAAGAGATTAAGAATTTAAGAATTT	CATTTCCAATTTAAAAAAATCCAAAC	256	AAAGGtAAGAGATTAAGAAtTTAAGAAtTtAGtCGGGtTGTGGTGGCGtACGttTTTGATCGtAGtAtTTGGGAGGtAGAGGtAGGCGGGTTTtTGAGTTTGAGGttAGttTGGTATGtAGAGTGAGTTttAGGAtAGttAGGGtTAtAtAGAGAAAtttTGTtTCGGAAAAAAACGGAAAAAAAAAAGGAAtTAAGAAtTtTATGTGTAAAATGAAGGAAtAGAGTTCGGTtTGGATtttTTTAAATTGGAAATG	31-173
B1_016	chr5:94139406-94139553	+	GTTTTATGTTATAAAATTGAAATAAGATTG	AATATCTCTCCTAATATCTCAAAAATTCTA	236	GTTtTATGttATAAAAtTGAAAtAAGATTGTTCGTAGAGtCGGGCGTGGTGGCGtACGttTTTAATtttAGtAtTCGGGAGGtAGAGGtAGGCGGATTTtTGAGTTCGAGGttAGttTGGTtTAtAAAGTGAGTTttAGGAtAGttAGGGtTATAtAGAGAAAtTtTGTtTTGAAAAGttAAAAAAAAAAAAAAAAAAATTGTTtATAGAAtTTTTGAGATAttAGGAGAGATAtt	38-184
B1_017	chr7:107166001-107166146	-	TGGTTGTGGGTTAGTTTTAGTTTTT	CCTACTCCATACTTACCCAATCTACAC	315	TGGtTGTGGGtTAGttTtAGTTTtTGtATTTtATTTTttTTATATATATGtttATtATTTTAAttATGtTTtTTGAAtATGAATGTAGtCGGttTGGTGGCGCGCGttTTTAATtttAGtAtTtAGAGGtAGAGGtAGGCGGATTTtTGAGTTCGAGGttAGttTGGTtTAtAAAGTGAGTTttAGGAtAGttAGGGtTATTtAGAGAAAtttTGTtTtAAAAAAAAAAAAAAAAAAAAAGAAtATGAATGTGttAGTGttTCGttTGAAGATttTAtAAAAGTAAAGGTGtAGAtTGGGTAAGtATGGAGtAGG	87-231
B1_018	chr7:107192139-107192286	-	GTAGAGGAAGATTAGAAATTTTTGAGTTAT	CTTCAATTATCTCATAAACAAATTCAATTA	291	GTAGAGGAAGATtAGAAATTTtTGAGTtAtAATtATAGtAAAATAAATTAAAGTAAATAAATAAAAAtCGAtTtAAAAAAAAAAAAAATGGAGttAGGCGTGGTGGCGtAtAttTTTAATtttAGtAtTTGGGAGGCGAGGtAGGCGGATTTtTAAATTCGAGGttAGttTGGTtTTtAGAGTGAGTTttAGGAtAGttAAGGGtTAtAtAGAGAAAtttTGTTTCGAAAAAAtAAAAAAtAAAAAAAAtCGAtAAtAACGtAAtTGAATtTGtTtATGAGAtAAtTGAAG	92-232
B1_019	chr7:107549788-107549935	+	ATGTATTTTAGAATTTTGGTTTTTTTT	AAAATACCATTTTACAATCTAAACTTTCC	419	ATGtATTTtAGAAttTTGGTTTttTtTTttACGtTTGtAAGTGGtAAAAGGAAAAtTtATTTtATAGTGAGTTAAAGGTtAAtTTTGGtAAtTTAGTAAGAtTAGtTTAAAGTTGAAAAGtAAAtAtAtAAGtCGGGCGTGGTGGCGtACGttTTTAATtttAGtAtTTGGGAGGtAGGGGtAGGCGAATTTtTGAGTTtAAGGttAGttTGGTtTAtAAAGTGAGTTttAGGAtAGttAGGGtTAtAtAGAGAAAtttTGTtTCGAAAAAttAAAAAAAAtAtAAAtAttAGtttAAtAAtAAtAAtAGtAGtAAAGGAtTGAGATAtAGGAtATGGTTAttTTAGtTTGTGCGAGTtttTGAGTTTTTAGTtTtTGGTATAGAGAGGGGGAAAGttt…	131-277
B1_020	chr7:109405377-109405522	+	TGAGGATTTTGGTTTTATTGTTTATT	ACCAAAAAATCTTTTTCTTTACCAATATT	348	TGAGGAtttTGGttttAtTGtttAtTCGGGGtAGGTTTtttATCGGATtttAGGAtAGGttTGTtTTATAGGtATTAAAAtATGTGATTtAAGtCGGGCGTGGTGGCGtACGttTTTAATtttAGtAtTCGGGAGGtAGAGGtAGGGGATTTtTGAATTAAAGGttAGttTGGTtTAtAGAGTGAGTTttAGGAtAGttAGGGtTAtAtAGAGAAAtttTGTtTCGAAAAAtAAAAAACGAAAAAtAAAAtAAAAAtAAtAAtAAAAAAAAAAtttAAAAAAtAAAAAAAtATGTGAtTCGAtAtTGtATGGAGtTATGAAtAtTGGtAAAGAAAAAGATtTtTTGGt	92-289
B1_021	chr7:109535484-109535630	-	GGATTATTTTTATAATATTGTTTTGAGTGT	AAAAAACTATCCAACCATCTCTTCAC	288	GGATTATTTttATAATAtTGTtTTGAGTGTGtCGGGCGTGGTGGCGtATGttTTTAATtttAGTGtTCGGGAGGtAGAGGtAGGCGGATTTtTGAGTTCGAGGttAGttTGGTtTAtAATGTGAGTTttAGGAtAGttAGGGtTATAtAGAGAAAtttTGTtTTGAAAAAttAGAAAGAAAAAAAAAATAtTGTtTTGAGTGTTTTTGTATGGATGTGTTTGTTTTTtTCGAGGGAAAATTtAtAGAGTGGTAAATTGGtTTGTGAAGAGATGGtTGGAtAGTTTTtt	31-176
B1_022	chr7:109747949-109748095	-	TTGGTAGTTATATGAAAAGAAAGGTAT	CCAATCCTCTAAATTTTCTAATTTTT	324	tTGGTAGTtAtATGAAAAGAAAGGtAtCGtATTGAAAAAAATAtAtTGAAGTtATtTtAGAATGTtAAtTTTTGAAGAGTAAGAAAATTtTGTtTAGAAAATttAGAGtAAGAGtCGAGTATGGTAGCGtACGttTTTGATtttAGtAtACGGGAGGtAGAGGtAGGCGGATTTtTGAGTTCGAGGttAGAtTGGTtTAtAGCGTGAGTTttAGGAtAGttAGGAtTATAtAGAGAAATttTGTtTCGAAAAAGtAAAtAAGttAAttAAttAAAtAAAtAAAAAAAAAAttTtttAAAAAAAttAGAAAATttAGAGGAtTGG	113-258
B1_023	chr7:109939584-109939732	+	GTTTTTTTTGGGTGTGTGAATTTATT	TCATCTTTAAATCATTTCTAAATCCTCTTT	350	GttTTtTtTGGGTGTGTGAATTTATTTTTTATTTTTTGGATGTGTGTATGTTAATAATGAAGTAAtAATtTGAGAATTAGGAAAAttAGtAGttAATTAGTATTTGtAGAttAtAAAAGTTGGAAGGAGAAATTGATAAGTAtAAAGAGGAAGtCGGGCGTGGTGGCGtACGttTTTAATtttAGtAtTCGGGAGGtAGAGGtAGGtAGATTTtTGAGTTCGAGGttAGttTGGTtTAtAAAGTGAGTAttAGGAtAGttAGGGtTATAtAGAGAAAtttTGTtTCGAAAAAAAtAAAAAAtAAAAtAAAAtAAAAATAtAAAGAGGATTtAGAAATGAtttAAAGATGA	152-299
B1_024	chr7:110022283-110022430	-	TTTTTGTGAAATTGTGGTGAGATTTA	CACTTTAACCTAACATTTCTAATCTTAAAA	400	TtttTGTGAAAtTGTGGTGAGAtttAAAAGAtAtAGGAAGTGAGGtTtATGAAAGTTATAAAtTtAGtTGGGCGTGGTGGCGtACGttTTTAATtttAGtAtTTGGGAGGtAGAGGtAGGCGGATTTtTGAGTTCGAGGttAGttTGGTtTAtAAAGTGAGTTttAGGAtAGttAGGGtTATAtAGAGAAAtttTGTtTCGAAAAAttAAAAAAAAAAAAAAAAAAAAAAGTTATAAAtTtTGAGGGTTTTGTGTTGTTGTGGAAtTttATAGAtTAGGtTGGttTTGAAtTtAtAGAGATttAttTGttTTTGttTttAAAGTGtTAAGATTAAAGGtATGTGttAttAtTGttTTGTAAAtTtTCGAGTTTTAAGAttAGAAATGttAGGTTAAAGTG	66-212
B1_025	chr7:110896264-110896411	-	TTATAATTTTTGTTATTGTATTTAAAGGTT	AATTATCAATTATCATTAAATCCTTTTT	284	TTATAATTTTTGTTATTGTATTTAAAGGTTTAGTTGTATAAAAGAATATTAAGGATAGTTTAGGTAAAAATAAGAAAAAAAAAGTCGGGCGTGGTGGCGTACGTTTTTAATTTTAGTTTTTGGGAGGTAGAGGTAGGCGAATTTTTGAGTTCGAGGTTAGTCGGGTTTATAGAGTGAGTTTTAGGATAGTTAGGGTTATATAGAGAAATTTTGTGTCGAAAAATTAAAATTAAAAATTAAAAAAAAAAAAGAAAAAAAAAAGGATTTAATGATAATTGATAATT	83-229
B1_026	chr7:110910915-110911061	-	GTGATAATTTATTTTTAAGAAAGATGTGTA	ATAATCTCTCATACAACTTCCTAATACTCT	239	GTGATAATtTAttTTTAAGAAAGATGTGtAGtCGGGtATGGTGGCGtACGttTTTAATtTtAGtAtTCGGGAGGtAGAGGtAGGCGGATTTtTGAGTTCGAGGttAGttTGGTtTAtAGAGTGAGTTttAGGAtAGttAGGGtTATAtAGAGAAAtttTGTtTtAAAAAttAAAAAAAAAAAAAAAAAAAAAAGAAAGATGTGtATAttAGAGtAttAGGAAGTTGtATGAGAGATtAt	30-175
B1_027	chr7:112509858-112510004	-	TTAATTTTGGAGTTTGTGTTTTAGTTTT	CACCTCATAACCTCTTACAAACAAC	304	TTAATttTGGAGttTGTGTttTAGtTTTGtttttAGTGAtATGTGTGAtTtttAGtAAGAAGtTTGAAGAAGAAAAGGTGAtTGAGAAGAGGGTTAGAAtTGTtTTTAGGtCGGGTGTGGTGGCGtACGttTTTAAttttAACGtTCGGGAGGtAGAGGtAGGCGAATTTtTGAGTTCGAGGttAAttTGGTtTAtAAAGTGAGTTttAGGAtAGttAGGGtTATAtAGAGAAAtttTGTtTtTtAAAAAAAAAAAAAAAAAGAAtTGttTTTAGGtAGGtTGTtTGtAAGAGGtTATGAGGTG	110-255
B1_028	chr7:126356522-126356668	+	TGATAGTTTTTTTATTTTGGATAGTGTTAT	ACCTAAAAAATTTTAAAACATACTTACCTC	299	TGATAGTTTTTttAtTTTGGAtAGTGTTATGtTATCGtAGTtAtATGGATATGTtTGGATATTtATtTAtAATTtTtTAtAAGTtTtTGTGGAGCGtCGGGCGTGGTGGCGtACGttTTTAATtttAGtAtTCGGGAGGtAGAGGtAGGCGGATTTtTGAGTTCGAGGttAGttTGGTtTAtAAAGTGAGTGttAGGAtAGttAGGGtTAtAtAGAGAAAtttTGTtTTGAAAAAttAAAAAAAAAAAAAAAAAAAAAAAGTtTtTGTGGAGGTAAGTATGTtTTAAAAtttTTtAGGT	96-241
B1_029	chr8:125493244-125493391	-	GTAGAGATTATAGTTTAAAAGTGAGAGGT	ACTAAACACATTTCCAACAAAACTAC	267	TAGAGATTATAGTTTAAAAGTGAGAGGTCGAGTCGGGCGTGGTGGCGTACGTTTTTAATTTTAGTATTTGGGAGGTAGAGGTAGGTGGATTTTTGAGTTCGAGGTTAGTTTGGTTTATAAAGTGAGTTTTAGGATAGTTAGGGTTATATAGAGAAATTTTGTTTCGAAAAATTAAAAAAAAAAAAAAAAAAAAAAAAAAAAAAAAAAAAAAAAAAAAGTGAGAGGTCGAAAGATAATAGTCGTAGTTTTGTTGGAAATGTGTTTAGT	31-177
B1_030	chr8:125493478-125493625	-	TTATATGTGTTTAATGATTTTTAGGG	ACCTCTCACTTTTAAACTATAATCTCTAC	302	TTATATGTGTTTAATGATTTTTAGGGCGTAAGGAAGTTTTTTAAATAGTGGTTAAAAAGATATAAAGTGAAGTCGGGTGTGGTGGCGTACGTTTTTAATTTTAGTATTCGGGAGGTAGAGGTAGTCGGATTTTTGAGTTCGAGGTTAGTTTGGTTTATAGAACGAGTGTTAGGATAGTTAGGGTTATATAGAGAAATTTTGTTTCGAAAAATTAAAAAAAAAAAAAAGATATAAAGTGAATTATAATGCGGGAAGTTTTTAAGAATGTAATACGTAGAGATTATAGTTTAAAAGTGAGAGGT	71-217
B1_031	chr9:26845562-26845709	+	AAAGTTAGTTTTTATGGTATTATGAAAAA	CATAACAATAAAACAACCATATTATCC	239	AAAGTTAGTTtTtATGGtAtTATGAAAAAAGGtAGtCGGAtTTGGTGGtAtACGttTTTAATtttAGtAtTTGGGAGAtCGAGGtAGGCGGATTTtTGAGTTCGAGGttAGttTGGTtTAtAAAATGAGTTttAGGAtAGttAGGGtTATAtAGAGAAAtttTGTtTCGAAAAAAAAAAAAAAGGtTTTAGGAtATAGAGGAATAAAAGAGCGGAtAAtATGGtTGtttTATTGtTATG	34-180
B1_032	chr9:109957276-109957425	+	TGTTATTTGTTTTTTATTAGTAAGTGGATA	ATTATCTTCTATCATACCATTTCTTTACAT	392	TGTTATTTGTTTTTTATTAGTAAGTGGATAATAAAATTTATAGGTTAGTAAAGAGATATAAAGTAATTAAGTGATACGAGGTTTTTAGTTTAAAAAATTATGTTTTAGTCGGGCGTGGTGGCGTACGTTTTTAATTTTAGTATTCGGGAGGTAGAGGTAGGTGGATTTTTGAGTTCGAGGTTAGTTTGGTTTATAAAGTGAGTGTTAGGATAGTTAGGGTTATATATAGAGAAATTTTGTTTCGAAAAATTAAAAAAAAAAAATTATGTTTTGTTTATAGTAATTTTTATTTTAATTTTTTTATTTAGTATTTTTTTTATCGTAAAAAAAATAAATAAAGGTAATTTAATGTTTTAGTTTTTATGTAAAGAAATGGTATGATAGAAGATAAT	107-255
B1_033	chr10:23255458-23255600	-	AAATTTAAGTGTGTATGTATTTATTGAAAA	ACTTCATATCCTTCCCCAAATATCC	306	AAAtTtAAGTGTGTATGtATTtATTGAAAACGTAAAAATGTATGtATtATTAAAATTTTtTGTTATAGtCGGGCGTGGTGGCGtACGttTTTAATtttAGtAtTCGGGAGGtAGAGGtAGGCGGATTTtTGAGTTCGAGGttAGttTGGTtTAtAAAGTGAGtTttAGGAtAGttAGGGtTAtttAGAGAAATTtTGTtTtAAAAAAAAATTTTTTTTtTGTTATATATTTATGtAATGtAtAAAtTATATCGTATATAGtAAGGATTAGTGTGTTGtAGTGGATAttTGGGGAAGGAtATGAAGt	67-208
B1_034	chr10:74940327-74940474	+	TTTTTTAAGGTGTTGGAAATATTTTG	ATATCCCATATATCTAATTTCAAACCC	327	TTTTTTAAGGTGTTGGAAATATTTTGGGGTGGTTTAATAATTTTGGATATTTATTAAATATAGTTGTATATTTGAAGTGTTTTCGTTGTTATATAAATTTTATTTTTATTTAAGAAATTTTAGTCGGGCGTGGTGGCGTACGTTTTTAATTTTAGTATTCGGGAGGTAGAGGTAAGCGGATTTTTGAGTTCGAGGGTAGTTTGGTTTATAAAGTGAGTGTTAGGATAGTTAGGGTTATATAGAGAAATTTTGTTTCGAAAAATTAAAAAAAAAAAATTTTTAAATGTTGTTTATGTTTATGGGTTTGAAATTAGATATATGGGATAT	122-268
B1_035	chr11:59526365-59526512	+	TTAATTAAAAATTTTATGTTATTTAAAGGA	AAACTAAAAACAATCTCTTCAACCTT	349	TTAATTAAAAATTTTATGTTATTTAAAGGATAAAAATTTTTAGATATATTTGATAGTAGTGTAGGTAATAGTATGAATTTTAGTTATGTATATAGTTTTTTATTTTTTTATATTATTTTTTGAGAGTAGAGTTTTGGATAGAGGATTTGAAAGATTAAAGGTTGAAGAGAAAGTCGGGCGTGGTGGCGTACGTTTTTAATTTTAGTATTCGGGAGGTAGAGGTAGGCGGATTTTTGAGTTCGAGGTTAGTTTGGTTTATAGAGTGAGTTTTAGGATAGTTAGGGTTATATAGAAAAATTTTGTTTCGAAAAATTAAAAAAAAAAAGGTTGAAGAGATTGTTTTTAGTTT	172-318
B1_036	chr11:78070190-78070333	-	GTGAGGGAATAAAAAGATATAAAGGGTATA	CTTAAATCATAATCTAAAACAACTCATTCT	244	GTGAGGGAATAAAAAGAtAtAAAGGGtAtAAGGAAGAATGAGtTGTtTCGtCGGGTGTGGTGGtttACGttTTTAATtttAGtAtTtCGGAGGtAGAGGCGGCGGATTTtTGAGTTCGAGGttAGttTGATtTAtAAAGTGAGTTttAGGAtAGttAGAGtTAtAtAGAGAAAtttTGTtTtAAAAAttAAAGAAAAAAAAAAAAAAAAAAAAAAGAATGAGtTGTtTtAGATTATGAtttAAG	49-218
B1_037	chr11:101463145-101463287	+	GTGTTTTAGGTTGGTTTGAGTTTTG	AATAATCTTCCTACCCAAAAATATTC	235	GTGTTttAGGtTGGttTGAGtTtTGGGTTGAAGTtTTTGCGtAGtTGGGCGCGGTGGCGtTCGttTTTAATtttAGtAtTCGGGAGGtAGAGGtAGGCGGATTTtTGAGTTCGAGGttAGttTGGTtTAtAGAGTGAGtTttAGGAtAGttAAAGtTAtAtAGAGAAAtttTGTtTCGAAAGAAAGTtTTTGtAtAAGCGAAATTAAACGAAtAttTTTGGGtAGGAAGAttATT	43-184
B1_038	chr12:56185933-56186080	+	TGTGTTTGGTATTAAGAAGTGTTAAAGT	TCTTCAAAACCCTACACTAATATTTATATT	263	TGTGttTGGtATTAAGAAGTGttAAAGtAGtCGGGCGTGGTGGCGtACGttTTTAATtttAGtAtTCGGGAGGCGGAGGtAGGCGGATTTtTGAGTTCGAGGttATttTGGTtTAtAAAGTGAGTTttAGAAtAGttAGGGtTATAtAGAGAAAtTtTGTtTtAAAAAAttAAAAAAAAAAAAAAGAAGTGttAAAGtAttTAAAATttAGtATtTtAtttCGttTGTttTGTAAtAtAAAtAttAGTGTAGGGtTtTGAAGA	29-176
B1_039	chr12:99101693-99101839	+	AGTGTGGTTTTAAAGAGGTATTTGT	ATTATCTAATACCTTCCCACCCTCC	255	AGTGTGGtttTAAAGAGGtAtTTGtCGtCGGGCGTGGTGGCGtACGttTTTAATtttAGtAtTTGGGAGGtAGAGAtAGGCGGATTTtTGAGTTCGAGGttAGttTGGTtTAtAAAGTGAGTTttAGGAtAGttAAGAttATAtAGAGAAAtttTGTtTCGAAAAAttAAAAAttAAAtAAAtAAAtAAAtAAAtAAAAAAAAAAAAAAAAAGAGGtAtTTGCGAAGGTGGGAGGGTGGGAAGGtAttAGAtAAt	27-210
B1_040	chr12:111623638-111623785	+	TTGAAGGATTTTTTTTAAATTTTTTTAAAA	CAAAAACCCTCTTCATTAAAATAATAAACT	278	TTGAAGGATtTTtTtTAAAtTtTtTTAAAATAGtTTATGTTTtTtATAATtTTAtTTGtTTtTTTTtTTTCGTATAAAATTTGTTTATCGtCGGTTGGTGGTGGCGAATGttTTTAATtttAGtAtTTGGGAGGtAGAGGtAGGCGGATTTtTGAGTTCGAGGttAGttTGGTtTAtAAAGTGAGTTtAAGGAtAGttAGGGtTAtAtAGAGAAAtttTGTtTCGAAAAAttAAAAAAAAAAAAAAAAAGTTTATtAttTTAATGAAGAGGGTTTtTG	90-237
B1_041	chr13:75573097-75573242	-	TGAGTGTTTTTTATTGATGGAAAAA	CACTCCCTACCTTAAAATTTCATAACTATA	374	TGAGTGTttTttATTGATGGAAAAAAAAAGtAtATATATttATGAtAtAATGTATATTTATTTGGTTTtTAAAAAGAtATttAtCGGGCGTGGTGGtTtACGttTTTAATtttAGtAtTCGGGAGGtAGAGGtAGGCGGATTTtTGAGTTCGAGGttAGttTGGTtTAtAAAGTGAGTGttAGGAtAGttAGGGtTAtAtAGAGAAAtttTGTtTCGAAAAAttAAAAAAGAtATttATAGtTGAATTGAAAtTGTAAATATGTAGAGTTTAATGTAATTTTATTGTAGTGAtATGtTATATAAGTGTTTTGTTTTAAAAttAAATTGAGTTtAATATTTAtTAtATAGtTATGAAAttTtAAGGTAGGGAGTG	84-228
B1_042	chr14:102115271-102115417	-	GATTTTTTAAAGTTAAGGAATTGAAATTAG	AAAAAAATCAAACACCTTAACCCTC	332	GATTTTttAAAGtTAAGGAAtTGAAATTAGTTAAGTGTttAAATTTTAAGATTtTTGTTTGGAAAAAATtTTAAAATAAAAAAGtAATTTTAGGtCGGGCGTGGTGGtAtACGttTTTAATtTtAGtAtTCGGGAGGtAGAGGtAGGTGGATTTtTGAGTTCGAGGttAGttTGGTtTAtAAAGTGAGTTttAGGAtAGttAGGGtTAtAtAGAGAAAtttTGTtTCGAAAAAttAAAAAAAAAAAAAAAAAAGtAATTTTATGGGTTTTGGTATAAGGTAGTTGATAGTAGGTAAATGTAAtAGACGAGGGtTAAGGTGTTTGAtTTtTTt	94-239
B1_043	chr14:120020556-120020704	+	TTTTTTGAAATTTATAAATGTATTAAAGGA	AAACTAAAAACAACTCTTCCTACCC	291	ttTtTTGAAATTtATAAATGTATTAAAGGAtAttATAGtCGGGCGGTGGTGGCGtACGttTTTGATtttAGtAtTCGGGAGGtAGAGGtAGGCGGATTTtTGAATTCGAGGttAGttTGGTtTAtAAAGTGGGTTttAGGAtAGttAGGGtTGtAtAGAGAAAtTtTGTtTCGAAAAAAAAAGAAAAAAAAAAAAGAtAttATATGTGAGAtTATTGTGGAAGTAAAATttAGATtTGAGTTTAAAAGAGAAAAGAtTTTATtAGCGGGTAGGAAGAGtTGtTtttAGttT	37-184
B1_044	chr17:87606564-87606717	-	TGATGAAAATGGTTTTTAAAGTTTTTAAA	CCTATCAAAAAACTACCACCTCCTC	262	TGATGAAAATGGtTTtTAAAGttTTTAAAAGtAAAGtAAAGGAAAAAAAAAAAAGtCGGGCGTGGTGGCGtACGTACGttTTTAATtttAGtAtTCGGGAGGtAGAGGtAGGTGGATTTtTGAGTTCGAGGAtAGttTGGTtTAtAGAGTGAGtTttAGGAtAGttAGAGtTATATAGAGAAAtttTGTtTCGAAAAAttAtAAAAtAAAAAAtAAAAAAAGTtTATAAAAGtAAGAGAGGAGGTGGtAGTTTttTGAtAGG	54-206
B1_045	chr18:34612630-34612780	+	GAAGGTATAAAAATATTGATTTGGAA	CATAAATCCTAAACTACCTCTTAACTTACT	289	GAAGGtAtAAAAATAtTGAtTTGGAACGTATtTGTAAAtttAGTAATTGGGAGAtAGAtAGAGGtAGAATTATTAAAAGTTtAAAGTCGtCGGGCGTGGTGGtTtACGttTTTAATtttAGtAtTtTGGAGGtAGAGGtAGGCGGATTTtTGAGTTCGAGGttAGttTGGTtTAtAGAGTGAGTTttAGGAtAGttAGGGtTATAtAGAGAAAtttTGTTTCGGGGGAAAAAAAAAAAAAGTTtAAAGTtATtTTAtAtAGtAAGTTAAGAGGTAGtTtAGGAtTTATG	89-238
B1_046	chr18:34884014-34884161	-	AATGTTTGAGTGGTTTTTGTAGTTG	AAAATTTCAAATTCCTTTCTTTAATC	558	AATGtTTGAGTGGttTtTGtAGTTGAAATGtTGAtTGGtTGAttTGGAGGGtAGAGGtAGTtTTtTTGAtTTTGttTttAAAGTAttAGAATTTTAAACGTGTAtTAtTGGttCGGAtTTtttAttTtAAtTTTGTTTTTTTTTTTTTTTTTTTTTTtTTTTTTCGAGAtAGGGTTTtTtTGTGTAGtttTGGtTGTttTGGAAtTtAtTTTGTAGAttAGGtTGGttTCGAAtTtAGAAATtCGttTGttTtTGttTtttAAGTGtTGGAATTAAAGGCGTGCGttAttACGttCGGtTTttAttTtAAtTTTGTAATAtATTTTTTAATTtTTtTTTTTtAGTTTGtATAtTTGAAGtTTttTGtTTttTtttCGGtttAGtTtAAAGATGAAGTTt…	154-300
B1_047	chrX:5612398-5612545	-	TATTAATGAAGAAGGTATTGATTGTTAAGT	TCAAAACTCAAATATTTCTAAAAAAATAAC	285	TAttAATGAAGAAGGtAtTGAtTGTTAAGtAAtTAAGAATAATTTtAAAGAttATATTTAAAAGTAGttTTATAGtCGGGCGTGGTGGCGtTCGttTTTAATtttAGtAtTCGTGAGGtAGAGGtAGGCGGATTTtTGAGTTCGAGGttAGttTGGTtTAtAAAGTGAAtTttAGGAtAGttAAGGtTATAtAGAGAAAtttTGTtTCGAAAAAttAAAAAAAAAAAAAtTAGttTTAGttttATTGATtAGAAAGttATtTTtTTAGAAAtATtTGAGtttTGA	74-220
B1_048	chrX:17329764-17329901	-	GGGGGTGGGGTATATTTTATTTTAG	ACAAAACTACTTTCCCATCAAATCC	258	GGGGGTGGGGTAtAtTTtAtTTtAGAATGTGtTTAAGGtCGGGCGTGGTGGCGtACGttTTTAATtttAGtAtTCGGGAGGtAGAGGCGGGTGGATTTtTGAGTTCGAGGAtAGttTGGTtTAtAGAGTGAGTTttAGGAtAGttAGGGtTATAtAGAGTAAtttTATtTCGAAAAAtAAAtAAAtAAAtAAAtAAAtAAAATGTGtTTAAGGATATATGTTTGtTtTTGATTGGAttTGATGGGAAAGtAGttTTGT	38-201
B1_049	chrX:33624783-33624930	+	TATTTTTGAGAGGTAGGGAGGATAG	AATTAATAAATATAACTAAAATCCCCTTTT	315	tATTttTGAGAGGtAGGGAGGAtAGGttAGAAGAttAGTtAATATTTTAATGGTAAAAtTtAGAtTGGGTTGATGTAAGAAAAtAGGTAAATATAGtCGGGCGTGGTGGCGtACGttTTTAATtttAGtAtTTGGGAGGtAGAGGtAGGCGGATTTtTGAGTTCGAGGttAGttTGGTtTAtAAAGTGAGTTttAGGAtAGttAGAGtTATAtAGAGAAAtttTGTtTCGGAAAAttAAAAAAAAAAAAAAAAAAAAGAAAAtAGGTAAAAGTATAAGTTGAGTTAAAAGGGGAtTTTAGTtATAtTTATTAATt	95-241
B1_050	chrX:44738896-44739035	+	TGTTGTAAATTTGGTTTAAATTTTTGTTAT	AATACTTCTACATTTTCCTCCTTCCTATTA	259	TGtTGtAAATTTGGTTTAAAtTtTTGTtATtAAtAATAGGGGAGAAAGtCGAGCGTGGTGGCGtACGttTTTAATtttAGtAtTCGGAAGTtAGAGGAAGGCGGATTTtAGAGTTCGAGGttAGAtTGtTtTATAGAGTGAGTTttAGGAtAGttAGAGtTAtAtAGAGAAAtttTGTtTCGAAAAAAAtAAAAtAAAAtAAAAtAATAGGGGAGAAAGGTAAAGAAAAtAATAGGAAGGAGGAAAATGTAGAAGtAtt	47-207
B1_051	chrX:53165835-53165979	+	TATTTATGGTAAGAGATTGGATTATTTTTA	CTTAACTCATCTTTTTATTATTAACCAAAA	276	tATTtATGGTAAGAGATTGGATtATTTtTATGAGGTAAAACGTTAtTGtTTAtCGAGCGTGGTGGCGtACGttTTTAATtttAGtAtTCGGGAGGtAGAGGtAGGCGGATTTtTGAGTTCGAGGttAGttTGGTtTAtAAAGTGAGTTttAGGAtAGTtAAGGtTAtAtAGAGAAAtttTGTtTCGAAAAAAAAAAtttAAAAAAAAtttAAAAAAtAAAAtAAAAtAAAAAAtATTAtTGtTTAATtTTGGTtAATAAtAAAAAGATGAGtTAAG	53-219
B1_052	chrX:66738467-66738609	+	TTTTTTTATAAAAGAGTTTGTTTTAAAAA	AATCTCTCTAAATTTTCTTAACCAAATAAA	225	TTTTTTTATAAAAGAGTTTGTTTTAAAAAAATATATAGTCGGGCGTGGTGGCGTACGTTTTTAATTTTAGTATTCGGGAGGTAGAGGTAGGTGGATTTTTGAGTTCGAGGTTAGTTTGGTTTATAAAGTGAGTTTTAGGATAGTTAGGGCGATATAGAGAAATTTTGTTTCGAAAAAAATATATATATATATTTTTTTATTTGGTTAAGAAAATTTAGAGAGATT	37-178
B1_053	chrX:77803699-77803840	-	AGTTATTAGTAAATTGAAGAAAATGGTAGT	TTACTCCAAACATAAAAATACATCTTAATA	314	AGttAtTAGTAAATTGAAGAAAATGGtAGTATTATtTTAGATTAAAATtATAtAGTAtAATGAATTTTTttAtAAtTATGTttTTTAAGAGTTttATTtTAGtCGGCGTGGTGGCGtACGttTTTAATtttAGtAtTTGGGAGGtAGAGAtAGGCGGGTTTtTGAGTTCGAGGttAGTtTGGTtTAtAAAGTGAGtTttAGGAtAGTtAGAGtTATAAAGAGAAAtATAttTTGTtTtTAAttttttttttttAAAAAAAAAAGAGTTttATTtTTtTTTATGAtATtAAGATGTATttttATGttTGGAGTAA	101-241
B1_054	chrX:89771417-89771563	+	TTAGTAAATATTTTTAGAAGGAAAGAGAAA	AAAATATTAAAAACTCATACTCTAAATTCA	400	TtAGtAAATATtttTAGAAGGAAAGAGAAATGAAtATTTTATTGTTAtATTGATTTTTAtTTtAATTTttATTGtTACGTATTTATGTAtAAttAAGAGTATtTtAtATTTTTATTATtTAGGAAGGATAAGTGAATGTATTTAGAAATAtTAAttTGtCGGGCGTGGTGGCGtACGttTTTAATtttAGtAtTCGGGAGGtAGAGGtAGGCGGATTTtTGAGTTCGAGGttAGttTGGTtTAtAGAGTGAGTTttAGGAtAGttAGGGtTAtAtAGAGAAAtttTGTtTtAAAAAAAAAAAAAAAAAAAtAAAAAAAAAAAAAAGAAATAtTAAttTTAGGGAAGAAATtATAAAtAATAGTAAAATTATGAATTTAGAGTATGAGtTtTtAATATtTt	158-329
B1_055	chrX:99742421-99742567	+	TGAATTTTTTAGGTTTTGAATTTGTAG	CCCACTAAAATCTCTTTAAAACTTTTT	273	TGAAtttttTAGGTTtTGAAttTGtAGGTAtTtTGGTTtAtAGttTGTGttAAGATtTAtAGTTGGTtAtAtTGGTAAGAGTtTtAAAGAGtCGGGCGGTGGTGGCGtACGttTTTGATtAtAGtAtTTGGGAGGtAGAGGtAGGCGGATTTtTGAGTTCGAGGttAAttTGGTtTAtAAAGTGAGTTttAGGAtAGttAGGAtTATAtAGAGAAAtCGTGTtTTGAAAAAAtAAtAAtAAtAAAAAAAAAGTtTtAAAGAGATtTtAGTGGG	90-235
B1_056	chrX:116954763-116954909	-	TTAAATTATGTTAGTTAAGAAGATGGTTAT	AATTTTATCATTTTTCATTAAAACTATATC	238	ttAAATtATGtTAGTtAAGAAGATGGTtATAGtCGGGCGGTGGTGGCGtACGttTTTAATtttAGtAtTTGGGAGGtAGAGAtAGGCGGATTTtTGAGTTCGAGGttAGttTGGTtTAtAAAGTGAGTTttAGGAtAGttAGGAtTAtAGAGAAAtttTGTtTtAAAAAtttAAAAAAAAAAAAAAAAAAAAAAGAAGATGGTtATAAGATAtAGtTtTAATGAAAAATGAtAAAAtt	31-176
B1_057	chrX:128153813-128153960	+	TTATATGGAGGAATTATTTAAGTGTTATAT	TCATTAACCAAATCTTTAAAAAAAA	343	TtATATGGAGGAATTATttAAGTGTtAtATTTGtTAATtTTtAGtTATTTTGTGTAttAGATTGAttTTTAAAGTTtTTTGtAAtCGGGCGTGGTGGCGtACGttTTTAATtttAGtAtTTGGGAGGtAGAGAtAGGCGGATTTtTGAGTTCGAGGttAGttTGGTtTAtAAAGTGAGTTttAGGAtAGttAAGAttATAtAGAGAAAtttTGTtTtAAAAAGttAAAAAttAAAtAAAtAAAtAAAtAAGtAAAAAAAAAAAAAAtATTAAAAAAAAAAAAAGTTtTTTGtAAAGTTAtAGTATAtAATATtAGTTTttTTtTttAAAGAttTGGTTAATGA	83-268
B1_058	chrX:138164679-138164825	-	AGGTATAGGTTTTATGGTTGAAGGG	ACTAAATACATTAAACACTTTTTCATCCAC	302	AGGTAtAGGtTttATGGTTGAAGGGAGGGGTATAGTATAAAGtTATGGTTTTTTGTGTGTTTTTATTAGGATATTTTTATtTATAATAAAtAATGGTGTGTAAAGtCGGGCGTGGTGGTAtACGttTTTAATtttAGtAtTCGAAAGGtAGAAGtAGGCGGATTTtTGAGTTCGAGGttAGttTGGTtTAtAGAGTGAGTTttAGGAtAGttAGGGtTATAtAGAGAAAtttTGTtTCGAAAAAttAAAGAAtttttttAAAAAAAAATGGTGTGGATGAAAAAGTGTttAATGtATTTAGt	104-249
B1_059	chrX:152943808-152943955	+	TTAAAAATATTTGGTTGTTGATTAAAAA	ACCATTTTTCCAAATCTAAAACTCC	279	TtAAAAATAttTGGtTGTTGATTAAAAAAAAAAAAtAAAAAtTTTtATtTAAGAtTTGAGGAGtCGGGCGTAGTGGCGtACGttTTTAATTttAGtAtTCGGGAGGtAGTGGtAGGtAGATTTtTGAGTTCGAGGttAGttTGGTtTAtAAAGTGAGTTttAGGAtAGttAGATtTATAtCGAGAAAtttTGTtTCGGAAAAAAAAAAAAAAAAAAAAAAAAAAGAtTTGAGGTTTGGGtTATTGtTAtATATTGGAGTTtTAGAttTGGAAAAATGGt	62-224
B1_060	chrX:164664873-164665024	-	TGTTAGAGTTTTTGAAAGGATTAGG	CTATATTTTTCTAAATCATCTCCTTAAATT	326	TGttAGAGTttTTGAAAGGAtTAGGCGGTGGAAGTTTAAGTGCGTtTAtTTAATTATAGtAtTTTATTttAtAAATAAGtAtAAATATCGtTTGTTtATTAAAAAATAtAAGTTGAGCGGGCGGTGGTGGCGtACGttTTTAATtttAGttTTtAGGAGGtAGAGGtAGAGGtAGGCGGATTTtTGAGTTCGAGGttAGttTGGTtTAtAtAGTGAGTTttAGGAtAGttAGGGtTAtAtAGAGAAAtttTGTtTCGAAAAAttAAAAAAGAAAAAATAtAAGTTGAttTTTtAAGAAttTAAGGAGATGAtTTAGAAAAAtAtAG	118-268
B1_061	chrY:363515-363663	+	TTTGAAAATTATTTAATTTTTGATTAAGTG	TAACTCACTCTCTCCTTTCTTTCCTATATA	335	tTTGAAAAtTAtTTAAtTtTTGAtTAAGTGAGAAGtTtAAtATtAAAAAGAGtAAAtTTTAAAAAAtAAAGtAGTGATTtttTGACGTGTTACGAAAATtTTTTttACGAGTTTGATtAGtATTAAAAGtATGtAGGAAGttAGGCGTGGTGGCGtACGttTTTTATtttAGtAtTTGGAAGGtAGAGGtAGGtAGATTTtTGAGTTtAAGGttAGCGTGGTtTAtAGAGTGAGTTttAGGAtAGttAGGGtTAtAtAGAGAAAtCGTGTtTCGATAAAAAtAAAAtAAAAAtAAAtAAAtAAGAtAtAtAGGAAAGAAAGGAGAGAGTGAGTtA	139-286
B1_062	chrY:558036-558170	+	TTTGGTTAGGTTTGAGATAGGTGAAT	AAACAAAAATTAAAAATAAAAAAATTTTTA	242	ttTGGtTAGGTtTGAGATAGGTGAATtAtAAttTTttTGTttAtTGTTAAGATtTtTTtATTtTtAAGTCGGGCGTGGCGGtAtTCGttTTTAATtttAGtAtTtAGGAGGtAGAGGtAGGCGGATTTtTGAGTTCGAGGttAGGTTGGTtTAtAAAGTGAGTTttAGGAtAGttAGGGtTACGtAGAAAAttAAGTtTtTtTTAAttAAAATAAAAATtTtTTtATTtTtAAttTtTGttT	67-200
B1_101	chr19:9460756-9460902	+	GTTATAAAATTGATTTGGTTTTAATTTATT	CAATCTTACTTAAACTATTTTACAAAATCT	288	GtTATAAAATTGATTTGGTTTTAAtttATTATAAAAAtATATtTAAAGtCGGGCGTGGTGGTGtACGttTTTAGTtttAGtAtTCGGGAGGtAGAGGtAGGCGGATTTtTGAGTTCGAGGttAGttTGGTtTAtAGAGTGAGTTttAGGAtAGttAAGATAtAtAGAGAAAtttTGTtTCGAAAAAAAtAAAtAAAAAAAtAAAAtAAAAAAtAAAAAAAAttATATtTAAATTAAAtTTTTAAGAtATGtTATTTTAAGAtTTTGTAAAATAGTtTAAGtAAGAtTG	47-192
B1_102	chr13:87726935-87727072	-	GATTGGGGGAGGTATTTTAAGTTAGAA	AAAACAACTCCAACCACAATATTAACAA	326	GATTGGGGGAGGtAtTTtAAGtTAGAATAAATAAGTTTAAtTGAGTGAtTAAAAATATtAATGATTTTATGTTTAATATTTTtTttATTtAGGtTTATATTTATtATAGTTTAAAAATtTTTACGtCGGGCGTGGTGGCGtACGttTTTAATtttAGtAtTCGGGAGGtAGAGGtAGGCGGATTTtTGAGTTCGAGGttAGtTTGGTtTAtAAAGTGAGTTttAGGAtAGttAGGGtTATAtAGAGAAAtttTGTtTCGAATtTTTAtAAATtAGAGAATTTAtTGTTTATTTTGtATTTGTTAATATTGTGGtTGGAGtTGTTtt	125-261
B1_103	chr16:88910710-88910857	+	ATTATATTTGGTATTATTGAGAAATTTAAG	TAACTCATATTAACATTATACACCTAACC	254	ATTAtATTTGGTAtTATTGAGAAAttTAAGGATAGTtAAGTGAtAAGAAATAtAAGGttATTGAGtCGGGCGTGGTCGAGtACGttTTTAATtttAGtAtTTGGGAGGtCGAGGtAGGCGAATTTtTGAGTTTGAGGttAGttTGGTtTAtAGAGTGAATTttAGGAtAGttAGAGtTATAtAGAGAAAtttTGTtTTGAAAAAAAAAAAAAAAAAAAAAAAtACGGttAGGTGTAtAATGttAAtATGAGtTA	202-348
B1_104	chr1:49596229-49596375	-	AAAGTATTTAATAATAATTTGTGAAAGAGA	ATATTTTACCTTCATTTACCTATAACCACT	331	AAAGtATttAAtAAtAATTTGTGAAAGAGAGGTGATAATTTTGAAAAAGAGTGTGGtTGGGCGTGGTGGCGtACGttTTTAATtAAAGtAtTCGGGAGGtAGAGGtAGTCGGATTTtTGAGTTCGAGGttAGttTGGTtTAtAAAGTGAGtTttAGGAtAGtTAGAGtTATAAAGAGAATtttTGTtTCGAAAAAAAAAAAAAAAAAAAAAAAAAAAAAAAAAAttAAAAAAAAAAAttAAAAAAAAAAAAAGAAAAAAGAAAAGAAAAAGAAAAAGAGTGTGAATGGGTATATGGAAGTAAGTGGTTAtAGGtAAATGAAGGtAAAATAt	56-200
B1_105	chr10:3921945-3922090	+	TATTGAATTATGGGATAATTTTTTTT	CTTTCACCTCCATACTTAAAATTTTT	336	tAtTGAAttATGGGATAATTTtTTTttTGTGTTGAAAAGGTTAAGTTTTGTTtAGGGTAAAAGTTGTTtATGtCGGGCGGTGGTGGCGtACGttTTTAATttTAGtAtTTGGGAGGTAGAGAtAGGTGGATTTtTGAGTTCGAGGttAGttTGGTtTAtAAAGTGAGTTttAGGAtAGttAAGAtTAtAGAGAAAtttTGTtTCGAAAAAttAAAAAAAAAAAAAAAAAAAAAAAAAAAAAAAAAAGTTGTTtATAAAGTATTtTGATtTttTAGttAAATGTtTTAAAAtttttTAAATTtAGTtTTtAAAAAAttttAAGtATGGAGGTGAAAG	72-247
B1_201	chr3:146458914-146459055	+	GGAAGTGTTTTTTGTTTTTGATT	AACACTTTCTTTCTTTCTTAAAAAAA	282	GGAAGTGtTtTtTGTtTTTGAttCGGGTtATACGGTTTTAtTTtCGGGGtCGttAAGTTtCGGAAtTAGCGtTTTGtTTTATGGATTAGtTATGTAAGAAAGTGttAAGGtTGGACGtTGGTGGTGGCGtACGttTTTAATtttAGtAtTAGGGAGGtAGAGACGGGCGGATTTtTGAGTTCGAGGttAGttTGGTtTAtAGttTGAGATttAGGAtAGttAGGGtTAtAtAGAGAAAtttTGTtTCGAAtTttttTttttttAAGAAAGAAAGAAAGTGTt	110-250
B1_202	chr9:109776312-109776456	-	TTGATTGGTGGGTTTTATGATGTA	ACAAAACAAAAATAATCTTTAAATTTTCAA	449	tTGAtTGGTGGGtTtTATGATGTAATtTGGGAGGGGCGGGGGCGGGGttTTGGGTTtAtTGtTAAtCGCGAGGAAtTGAtTGGGAGtTGAGGGCGtAGtTtATAGTAGtTGttTGAAACGTGGtTGGAttAAGTTGAGAAGGAAtATTGTTGAATGtAAAAtTGATTATATGGGGtCGGGCGTGGTGGCGtACGttTTTAATtttAGtAtTCGGGAGGtAGAGGtAGGCGGATTTtTGAGTTCGAGGttAGttTGGTtTAtAAAGTAAGGTttAGGAtAGttAGGGtTtTAtAGAGAAAtttTGTtTCGAAAAAtAAAtAAAtAAAtAAGAAAAAAtTGATTATATAATTGGGAGTGTATTTAGTAAtTTAAATAATTTtATGTTTtTTTTAGTTTTTT…	175-318
B1_203	chr5:122652069-122652216	+	TGGAAAGTGAGAATTGATGTTTTTTAT	CCTAATTTACCCTTCTACTATATCTAATTT	251	TGGAAAGTGAGAAtTGATGTtttttAttTTGtATTGTGGTAAAAGTAtAAAAtTAAGttAGGTGTGGTGGCGtACGttTTTAATttCGGtAtTCGGGAGGtAGAGGtAGGCGGATTTtTGAGTTAGAGGttAGttTGGTtTAtAGAGTGAGTTttAGGAtAGttAGGGtTAtAtAGAGAAAtttTGTtTCGAAAAAttAAAAAAAAAAAAAAAAAAGTAAAAAAtTAGAtATAGtAGAAGGGTAAATtAGG	56-203
B1_204	chr10:62187974-62188118	+	TGGTTTTTTTATTTTTGTTTGGAATAT	ACCTAAAATTAATTATCAACACCCAC	384	TGGTtttTtTATTtTTGTTTGGAAtATGTTTGGAAGAATAAGttTGTAAGAAtTTCGTTGTTAGCGGGtAGTGGTGGCGtACGttTTTAATtttAGtAtTCGAGAGGtAGAGGtAGGCGGATTTtTGAGTTCGAGGttAGttTGGTtTAtAGAGTGAGTTttAAAAtAGTtAGGGTTATAtAGAtATATttTGTtTCGAAGAAtAAAAAAAAAAAATTTTTTTTTGTTTAtATTtTTTTtATTTTTAGAGGGTTTTGttTttATGATTTATGCGtAtAGGTGTGGGtTTGGTGttttTGGAGtTGAGAAGACGAtAGATttttCGAAAtTAGAGTTttTGAtCGGTGTGAAttAtttCGTGGGTGtTGATAATtAATtttAGGT	65-208
B1_205	chr10:79576419-79576571	-	TTGAGTTAGGAGGATGGTTATATTG	AATCAACATCTAATAAATCAAAAAAAA	341	tTGAGTTAGGAGGATGGttATAtTGCGGTCGtTGtttAttTCGTtAGttTTAAAATtAtAATTAAAGAGAtAAGAATAAGAAttAGTCGGtCGGGCGGTGGTAGCGtACGttTTTAATttTAGtAtTTGGGAGGtAGAGGtAGGCGGATTTtTGAGTTCGAGGttAGttTGGTtTAtTtTAtAGAGTGAGTTttAGGAtAGttAGGGtTATAtAGAGAAAtttTGTtTCGAAAAAttAAAAAAAAAAAAAAAAAtAAAtAAAtAAAAAAAtttAGTCGGtAGttTGAATtACGTGtttTttCGtttATTTttTttTtttttTGAtTtAtTAGATGtTGATT	90-241
B1_206	chr14:29831235-29831381	+	ATTTTTTAGGGAAAGGAGATTGTTT	CACAACCCTTAAAAAACAAAATTAAAAA	384	ATTtTttAGGGAAAGGAGAtTGttTCGGAGAAGAGtTGCGAGGtttAAGTCGttttAtATtTCGTGGATTGAGtTTtCGTGttttTATGTAGAGGGTtttAAATTCGGttTAAtTTTTTGGTTGtCGGTTTttATGGtTtATTtttAGGttAGTtttTtTTGGTAAAGAttAGttAAGGGtCGGGCGTGGTGGCGtACGttTTTAATtttAGtAtTCGGGAGGtAGAGGtAGGTGGATTTtTGAGTTCGAGGttAGttTGGTtTAtAAAGTGAGtTttAGGAtAGttAGGGtTATAtAGAGAAAAttCGTtTCGAAAAAttAAAAAAAAAAAAAAAAAAAGAttAGttAAGGGGTTtttTTAAtttTGTtTTTtAAGGGTTGTG	180-326
B1_207	chr7:45357209-45357349	+	TGTTTTTTAAGTTGTTTTTTTATTTTTTAT	TATAATCATTTTCTTAAAACCACAAACTAT	270	TGTtTTTtAAGTTGttTTTTTAtTTTTTATTTTGAGATGGGGATTTGtTATTGTTATtAATTAGTtTGTGGGGttCGGGCGTGGTGGCGtACGttTTTGATtttAGtAtTtTGGAGGtAGAAGtCGGCGAATTTtTGAGTTCGAGGttAGttTGGTtTAtAGAGTGAGTTttAGGAtTGttAGGGtTAtAtAGAGAAAtttTATtTCGAAAAAAAAGttAATAAAATAAAATAAAATAAAATAGTtTGTGGTtTtAAGAAAATGAttAtA	75-214
B1_208	chr17:88577510-88577645	-	TTGTGAATTTTTATTGTGGGGTTTA	AAAACAACCTCCAACTCTAATCCTAAT	340	tTGTGAATTtTtAtTGTGGGGTTTAGtTGTttTTAGGGtAGCGTTAGAGtATTTttTATTTAAGtATTAAGATGTTAAAGGGtAAGGAAAGGtAAGATtATGAGGCGAtAATttAAATtAtATtAttTtTtATTtCGGGTTAGGAAGTAATCGCGGTGGTGGCGCGtACGTtTTTAATtttAGtAtTTGGGAGGtAGAGGtAGGCGAATTTtTGAGTTCGAGGttAGttTGGTtTAtAAAGTGAGTTttAGGAtAGttAGGGtTAtAtAGAGAAAtttTGTtTCGAAtAGtATGAGttAttTATGTTttAATAAtTAGGATTAGAGtTGGAGGtTGtTtT	152-287
B1_209	chr15:81754011-81754158	+	GGTGTATTTGATGGATATGTTTATTAAAGT	CAAACAAAAAATCTTTTATACCTCAAACTA	379	GGTGtATTTGATGGATATGtTtAttAAAGtTtAGtAtAtAAAGtTTAAAtAGtTGAAAtAGAtTtACGtTTGTAATAttAGCGtAAGAGAGGGTGAGGtTGGAtAATtAtTGtAAGTTtAAGAttAGttTGAGTTAttAAATGAGATttTGTGGtCGGGtAGTGtTGGCGtACGttTTTAATtttAGtATTTGGGAGGtAGAGGtAGGCGAATTTtTGAATTCGAGGttAGtTTGGTtTAtAGAGTGAGTTttAGGAtAGttAGGGtTAtAtAGAAAAAtTtTGTtTCGAAAAAttAAAAAGAAAtAAAAAAtAAAAAAtAtAGATtAGtTAtATAGTGAATTtAAGTtTAGttTGAGGTAtAAAAGAtTTTTTGTTTG	153-300
B1_210	chr15:36119153-36119289	-	TAGTTTTTTTAAATTGTGGTGTGGG	AAACAAACAAACCTCTCCTTAACCTAT	350	TAGTTtttttAAAtTGTGGTGTGGGtTGGGTtTTAAGAATAAAAtAtATTTTCGtCGGGCGGTGGTGGtAtACGttTTTAATtttAGtAtTTGGGAGGtAGAGGtAGACGGATTTtTGAGTTttAGGttAGttTGGTtTAtAAATCGAGTTttAGGAtAGttAGGGtTAtAtAAAGAAAtttTGTtTCGAAAtAAAAtAAAAtAAAAtAAAAtAAAAtAAAAtAAAAtttAtAATTTtAATAATAATAAAtAttAGGGGGAATGTTTATTAtAGTtTTtACGATttTAGAGTGTATTAtTtTTTAtAtAAGAGTAATAtAtTAATAGGtTAAGGAGAGGTTTGTTTGttt	53-228
B1_211	chr13:67626622-67626768	+	AATTTAAGGTAGGGGGAAATTTTATAGT	TCACCAACAAATATTTTCTAAACACTC	309	AAttTAAGGtAGGGGGAAATttTATAGTGtAtAGTGGATTAAGAGTTAGTAtAtACGtCGGGCGTGGTGGCGtAtAttTTTAATtttAGtTtTtCGGAGGtAGAGGtAGGtAGATTTtTGATTTCGAGGttAGttTGGTtTAtAGAGTGAGTTttAGGAtAGttAGAGAAAtttTATAtAGAGAAAtttTGttTCGAAAAAAAAGAGTTAGTAtAtAtATtATTGTGATtttAGTAAtTtTGTttCGttttTTGGGAGAtATAtAGAAGAGAAAAAttAGTGGAGTGtTtAGAAAAtATtTGtTGGTGA	56-202
B1_212	chr19:7560795-7560940	-	TTAGGATTATAGGTGGTGGTATGAAAG	TTACAAAAAATAAATCATAACTCAAAATAA	495	ttAGGAtTAtAGGTGGTGGTATGAAAGAATTAAtATGATGACGCGAACGtTTCGAtTTTGAtTTtAtAAGGAtAGAttATCGTGAtTTtATTATtATtAttATtAttttTAATtTtTGATtTGAttAAGGtTTAtTAAAAGtTAAAGTAACGtCGGTCGTGGTGGCGtACGttTTTAATtttAGtAtTTGGGAGGtAGAGGtAGGAGGATTTtTGAGTTCGAGGttAGttTGGTtTAtAAAGTGAGTTttTGGAtAGttAGGGATAtAtAGAGAAAtttTGTtTCGAAAAAtAAAAAAAtAAAAtAAAAtAAAtAAAtAAAAAGtTAAAGTAAGAttTTAtTAAGTtAGGtTtCGGGTGGtACGtTGGTAATtttAGTAtTGGAGAttAGGAGAGGAGG…	152-296
B1_213	chrX:102130302-102130440	+	GTTTTATTTGGGTTAGTTAATATAAATTTA	TCTTTACTTAAAAAAAATATACTTCAATTC	282	GTTTTAtTTGGGTtAGTTAAtAtAAATTtATAAAGGAAGAtAATGATtTTTAtAtAAtTAAGTGttTGTATTTTAAGAAtTGAAGTATAAGtCGGGCGTGGTGGCGtACGttTTTAATtttAGtAtTTGGGAGGtAGAGGtAGGCGGATTTtTTAATTCGAGGttAGttTGGTtTAtAGAGTGAGTTttAGGAtAGttAGGGtTAtAtAGAGAAAtttTGTtTCGAAAAAtAAAtAAAtAAAtAAAtAAAtAGAAtTGAAGTATATTTTtttTAAGTAAAGA	89-229
B1_214	chr13:13228786-13228931	+	TTAATGATTAATAGTTGATTGGAAATATTA	CAAAAAATCCTAAACAATCCTTTTT	234	tTAATGATtAAtAGtTGAtTGGAAATATTAtATTGtTTAAAAGTTATtTTTATTtTGtCGGGCGTGGTGGCGtAtAttTTTAATtttAGtAtTCGGGAGGtAGAGGtAGTCGGATTTtTGATTCGAGGttAAttTGATtTATAGAGTGAGTTttAAGAtAGttAGGGtTATAtAGAGAAAttTTGTtAAAAAAAAAAAAAAAAAAAAAAAAAAAGGAtTGTttAGGATTtTtTG	57-215
B1_215	chr13:54632400-54632547	+	GGGTGGTGGTAATTATGGTATTAGT	CAACTATTTAAACACATTTTACAATTTACA	357	GGGTGGTGGTAAttATGGtATTAGtCGTATttTTAGTTtTTAtATATAAtTTtAAAATGTtTATTtttTTGCGGATGTTTTAGGAGGTAAAtTGAGTTTATGGGTGTTAtACGGTATTTAGAAGAtTTTGGGGtCGGGtAGTGGTGGCGtACGttTTTAATtttAGTAtTCGGGAGGtAGAGGtAGGGGGATTTtTGAGTTCGAGGttAGttTGGTtTAtAGAGTGAGTTttAGGAtAGttAGGGtTAtAtAGAGAAAtttTGTtTCGAAAAAAtAAAAAAtAAAAAAAAAAAAAAtAAAAAAAAAAAAAGAAGAAGAAGAtAAtTTTGTAAAtTGTAAAATGTGttTAAAtAGTTG	133-319
B1_216	chr5:145020573-145020714	-	TTTTTTTAAGATAAAATTGGAAGGTGATAG	TCACTATTAATAATTATCACAAAACCTACT	378	TtttTTtAAGAtAAAATTGGAAGGTGAtAGAttTtAAGttAAGttAGAGCGGTGAAGAAACGTGGTGGGGAGTAGGGGTATttTGTGATAtttAGATGAGGACGAAGGTtTTTtTTTGAAAGGGAtAAtTtAGtCGGGTGTGGTGGtTtACGttTTTAATtttAGtAtTCGGGAGGtAGAGGtAGGCGGATtTtTGAGTTCGAGGTtAAttTGGTtTAtAGAGTGAGTTttAGGATAGtCGGGGtTAtAtAGAGAAAtttTGTtTCGAAAAAttAAAAAAAtAAAAAAtAAAtAAAtAAAtAAAtAAAAAAAAtCGAAAGGGAtAAtTtTATtAATTtTAtAtTAtCGAGTAGGTTtTGTGAtAAttAtTAAtAGTGA	132-272

## Sheet: Table S2
Supplementary Table S2. PCR primers for the methylation analysis of autonomous retrotransposons
retrotransposon name	primer sequence (F)	primer sequence (R)	amplicon sequence based on the consensus sequence (nonCG-cytosines are converted into t)	PCR length
L1 A monomer	TGGATTATAGTGTTTGTTTTAATTTAAT	TATATTCCACTCACCAAAAATCTT	TGGATtAtAGTGttTGttttAATttAATCGCGCGGAAtTTGAGAtTGCGGTAtATAGGGAAGtAGGtTAttCGGGttTGATtTGGGGtAtAAGTtttTTtCGtTCGAtTCGAGAtTCGAGtttCGGGtTAttTTGttAGtAGAGTtTTGtttAAtAttCGtAAGGGTttAtACGGGAtTttttACGGGAtttTAAGAttTtTGGTGAGTGGAAtAtA	217
L1 Gf monomer	GTTAGAGAATTTGATAGTTTTTGGAATAG	ACCCACACAAAATACTACCTCAAC	GttAGAGAAttTGAtAGtTTtTGGAAtAGGCGGAAGtAtAGAGGCGtTGAGGtAGtAtttTGTGTGGGtCGGGGAtAGtCGGttAttNTtCGGAtCGGAGGAtAGGTGttCGttCGGtTGGGGAGGCGGttTAAGttAtAGtAGtAGCGGTCGttATtTTGGTtCGGGAttCGtCGAAtTTAGGAAATTAGTtTGAAtAGGTGAGAGGGTGCGttAGAGAAttTGAtAGtTTtTGGAAtAGGtAGAAGtAtAGAGGCGtTGAGGtAGtAtttTGTGTGGG	280
IAP	TTGATAGTTGTGTTTTAAGTGGTAAATAAA	AAACACCACAAACCAAAATCTTCTAC	tTGAtAGtTGTGTTtTAAGTGGTAAAtAAATAATtTGCGtATGTGtCGAGGGTGGTTtTttAtTttATGTGtTtTGttTTtttCGTGACGTtAAtTCGGtCGATGGGtTGtAGttAATtAGGGAGTGAtACGTttTAGGCGAAGGATAATTtTttTTAATAGGGACGGGGTTTCGTTTTtTtTtTtTtTTGtTTtTTGtAtTtTGGtTttTGAAGATGTAAGtAATAAAGTTTTGtCGtAGAAGATTtTGGTtTGTGGTGTTt	263
MMERVK10C	GGGTTAGGTAGTGTTTTTGTAAAAA	ACAATCCAACCTAAAACATAAAACC	GGGttAGGtAGTGTTTTTGtAAAAAAtTTTttTGtATATGTAtAtATTGGTTGTTTATttAATtTTATGCGTGGTGGtTAGtAGTAGTtAGTGttAtTtAGtAAtAGtAtATGTGGtTTtttAtATtTtttttTGTTTGTTTTAATAAAATGAGGtTGGAtTAGGttTGTGtAATTATGtttATtCGtCGTGGtTttTGTTTTAGGTCGTTttTtTAATGTtAtAGttTTAttCGTtATAGGGTAAtttTATCGttAtCGGGttttATGTtTTAGGTTGGAtTGT	285

## Sheet: Table S3
Supplementary Table S3. real-time RT-PCR primers
gene name	associated B1	primer sequence (F)	primer sequence (R)	PCR length
AK054519	B1_216	AAGAAAGATGGCGTTCGTTG	TTCTCGCTGACTTCCTGCAT	150
Nid1	B1_214	ACGGACATCACGTCGGTCTA	GAAGGTTCCGGGATGGTATT	87
Polr3h	B1_209	CATTGCTGAGGAGCTGAACA	AACACATAGGCGTCCTCCAG	105
Zfp759	B1_211	GCATTTGGATTTCTGACATGG	TCCAGCATCACATCCCTGTA	124
Arpc3	B1_203	TCTGAGTTCGGCTTCTCTGG	GCCATGTTACCGATGAGCTT	101
BC023829	B1_052	AAGTTCTCCGCCATGAACC	AAGGGCCAGTAGCACAGAGA	102
Dhdh	B1_207	CTGAGCTCACTGCCTTCCTC	CCTTGGCCAGTTCCTCATAA	130
Mbtps2	B1_059	ATCCGTCGCTACGATGATTC	TCCATTGTTTTCCAGCCAGT	139
Ccar1	B1_206	GGGTTTGAAATGGCTTCTCG	CCTCCAAACTGAGCCATGAT	107
Eif3c	B1_028	GCGAGGATGAGGAGGATACA	CCCAGGAGCTCAAACTCTTCT	145
Polr2k	B1_210	GGTAGCACACTCCTGCCATT	TTTCGGTGTGACACTCTCCA	124
Atl3	B1_212	CGTCCTCCTCCAAGACCATA	CCCAACCAGTCTGAATGACC	147
Faf2	B1_215	ACTCAGGAGCAGACCGAGAA	GTTATGCTGCTCCAAAGCAAG	93
160002K03Rik	B1_205	ACGTAATCACTGGGCTCTGC	GTCTCTTCCTCGCTGTCCTG	148
Rpf1	B1_201	CCCCGGGCTTCAGTATCT	GCCAAGAGCCTCTCTCTCCT	134
Gapdh	(internal control)	CAGGTTGTCTCCTGCGACTT	CCCTGTTGCTGTAGCCGTAT	133

## Sheet: Table S4
Supplementary Table S4. PCR primers for the methylation analysis of regions around TSS
gene name	associated B1	primer sequence (F)	primer sequence (R)	amplicon sequence (nonCG-cytosines are converted into t)	PCR length
Bxdc5	B1_201	TTTTTGAAAGAGTTTGGGGTTA	CTAAAAAACCTCAAAAAACTAC	TttTTGAAAGAGTtTGGGGttACGTTTAGGAttTGGAGTTTAttAttAACGtTAGGtAGGCGGGATGCGtAAAGGtAGGGGGCGGAtttTtTGttATtTtCGGttAGAGGtTGGATCGTCGGTTttAAATtttTCGGtTTtttAGAGAGTGtAAtttACGGAGtAGGtAAGGGtCGGATTttttTACGttAAGtTtATtCGGtAAAAGGtTGACGtTGGGGAtttCGTAGttAAGCGAGGGGtTGGGGGCGCGttTtCGGtttCGttttTTtAAtttCGCGCGttttCGGtttCGttttTTtAAtttCGCGCGCGtACGTCGttttttttttAGtttCGCGCGtTttCGGtttCGttttTGCGtTCGTGtttCGttAAtttCGCGCGCGTAttTTtCGt…	556
Mtap4	B1_202	AGTATTTTTTTTGTTGGAAAAGGAAG	CAAAAACCACAAACCTAACC	AGtATttTTTtTGtTGGAAAAGGAAGCGGCGGtttTtTtAGAACGGCGGAGGCGGttTGAGttTCGttATTCGtTGAGGtATtCGCGGGCGGGAGGtCGtAGTtTAGAttttCGACGCGCGtCGCGttAACGGTtCGttAtTCGTGtTGtTTttACGGAGAGGGCGAGGAGTAGGGGtCGGCGTGGATTGGTTCGCGGCGttTCGGttCGtttTTCGGTGGCGtttATTGGtTGGGGCGGtAttCGtTGACGGCGAGtACGtTtCGttTTCGTGtCGGttTTtAAGAGGGCGACGAGGAAGCGGttAttTtttTGTGtttCGttttTtCGGtTAGGTtTGTGGtTTtTG	349
Arpc3	B1_203	TTTTAAAATTTAGTTTTTTATTTTGAA	ACCTTATAACACAAATCTCCTACCAC	TTTtAAAATttAGttTTTTATTtTGAACGTGtTTTATGtATGCGttACGGTtATCGttTtACGtTGACGCGtttttTGGCGTtAtTTGCGGTtAGCGtAGtCGGAGtAAGTtAtCGGAAGTGCGTTTATTttTTtCGttCGttTtTTtCGGtTTAtTTtCGtttAtTttAtttAGGtTCGGTCGTCGGAAACGtTTTtTGAGTTCGGtTTtTtTGGATCGAATtCGGAtAtCGTtAAGATGtCGGTAAGtATTCGAGttttAGGGGCGGGGAGtCGAGCGGGGCGAGGGTtCGAGGGGTGGtAGGAGATtTGTGTtATAAGGt	323
Ccar1	B1_204	TGATTAGATTTTTATTTGAGTTTGGTT	AATTCTTACAAACTTATTCTTCCAAACATA	TGAttAGAttTTtAttTGAGTtTGGttCGGGTTAAtCGAGAAGttATTTtAAAttCGTtAAGtTtAGGCGtATGCGtAGAtTGtTTTttttTttAAttttttTGttTACGtCGtAtCGttTttCGGTTtCGAGAGGAACGGGCGCGTGCGCGAAAAAAGTTCGGCGTGCGCGtTtttCGCGAGTGCGTTtAtTGGGGAGCGAGAGCGAGttTtAGtCGGGTTAttTTGAtTTCGtTGAAtAATGAGtTGGtTGTCGtTCGttTGtTtTGAGGttAACGtTGTttTTtttTGGGAGAGAGAGGGAGAGCGAGCGGtAGTtACGTGGTtCGGtCGGTGTCGtCGtCGttATtTTGTGGTtttTtTATTtTTGTTTGGAAtATGTTTGGAAGAATAAGttTG…	407
1600002K03Rik	B1_205	GTTGTTTGAATAAAGGGTTGTGATT	TCCTCCCCCTAACTCACTAAATACTA	GTTGttTGAATAAAGGGtTGTGAtttAGAAttttCGAtTtTGTGGtTTGGGTtTGAGACGTGGtAGGGATAGGGGTGAtTAGGGCGtAGCGGGTAAGAGTtTTAGTGTttAtttATtTttATAATAAGGCGtTAAGATGAAtAAtttTAGGATTGCGtAGGGtATTGTGGGCGGGGCGGGGtTGTGTGtAtTTtCGttTtAGtTtCGGtATGGtAtTACGtATGtTGtTGtTGtTGtTGtTttTtTGGTGTAGtAAtttTGGTTtCGtTGAAAAtTttAGttTGtCGGGtttAttTTATAAttAtAtAAACGGGAGGtTttCGGAtAGGGAtACGGGtTtCGCGGTGtTtCGtTTGTTtTACGTAATtAtTGGGtTtTGCGGttTGATtTCGtTTTAtT…	463
Glt8d1	B1_206	TGTTTTAGTATGGTTGTTGAAGAT	ACTATACCTCCCTCTACCAAAAAAC	TGTTttAGtATGGTTGtTGAAGAtCGATAtCGAtAACGAAACGGACGTAGtCGATTATTAAGGAGTAAAGTTTGCGGGGGTCGATATCGAGAGtAAGGtCGAttAGtCGAGCGTTTtAtTTCGGtCGTGGtttCGGAAGCGGATGTtTtCGAGGGGtACGGAtAAttttTGGtttCGtttCGCGttATCGAtAAGGGAGGTACGTtTtTTAGtTTTttTAGAAtttTGTAtAtTGtTtACGAGGGtTGGGGtAGCGAttTGGtCGGAGtATCGTGtAtCGGTtAGCGtTttTGGtCGttCGGAGtTGTAATTGCGGtAGGAATtAtTTGCGGGtTGCGttTttttAGTTTAACGGtCGtCGGCGCGtTttACGTtTttATAGCGACGGttTTTAtTCGG…	470
Dhdh	B1_207	TTTTTATGGTTTTGGGGATTAGAA	ACAAACCAACTTAAACAAAAATTAAACA	tTtTTATGGttTTGGGGAttAGAAGGGTttttTTtTtTTtTtAGAGTtAtTGttTTAGAttTAGGGAtTtTttTtttTtAtAtTCGGGGtTtttTCGTTttTCGGAtTAGGGAtTtTTTtTTAGAtttTCGGtTttAtTttTtttTCGGAtttAGTGTtTTttAAGGGACGTGtAttTGGTGtTtCGAGGAAGGtAGTGAGtTtAGtACGGTGGTAAAGTCGTTGGtAATTAAGttAGtCGAtACGATGttttAGCGtAGCGttATTTTGtACGTtTTtTGttTGCGGGGGtCGGAGGCGGGGttAACGttAtttCGCGtTGtAAGtCGttCGtTTtttTTTGAtttTtAGGAtACGAttTtAGGACGTGAAAtCGtAATtTtTttAttCGTtTttTtt…	487
Gtf2a1lf	B1_208	GTGAGGTATGGTAAAAATAGGAATAATATT	TTCCTATACCCCATAATAAAAAAAA	GTGAGGtATGGTAAAAAtAGGAATAAtATtTTtTGtttTtTTTtTTtTTtttTTtATttTTtAAAGATGAGGTTGttttATCGAttTGAtAtTGtAtAAttTtttTTAGtTAAAGTTGGTTGTACGttTTAttAtAttCGTGttACGtttAAAtTTTATTTtTttAAttttTAAttTTTtTTGttCGGTttTAtTtAGtTtCGtttttAGCGGttTCGCGGTTGCGtAGtAACGAGGAtttACGGTTtAAAAGCGAGttTGGCGGtTtTtTGttACGtAGGCGtAAACGGTTAGGtAtAGAGCGGtTGGtATGGttTTtATtAAttTGGTGGTAAGGAGGCGGGtAGGtTTTGtCGAtAtttTttAGAtTTTGATAGGtAtttttTTTTtAttATGGGG…	407
Hccs	B1_060	AAGTTTATGTTATTATTTGGGGATT	CAACACTAATAACTTCCTACCCTTC	AAGttTATGttAttATTTGGGGAttCGTGttAGAGTtTGGAAAtTTGTAAGATGtAAttACGTCGTGAAGACGGGTGTAGTtTTGATGGTGGGGTttAAGGGAAAATAtAtTGAAtTAGttTCGAAttCGTGTTtttAGTAGGGtAGGCGttTtAGGGAAAATAGGAAGGTTAAAAAAAAAAAAGTtAttAAAACGGGAGGtAAGGAGCGGCGAAGGGtAGGAAGttAttAGTGTTG	237
Polr3h	B1_209	GTTTGGGTTTTAATTTTGGAAGTTA	ACCCTTTTCTACCCACTCTCTTAAA	GttTGGGtTttAATTtTGGAAGtTACGtTCGTtTttCGGAGGAAAtTGAGGttCGtTttCGttAGttTTGGAGGAGCGtCGGtTtttCGTtttCGGATGttAtttTGGttTCGTTtCGTtCGtAttACGCGCGGGAGttACGCGCGTttAGtAACGtTGCGtTTGttAAAttAAATtAAtTtAGtTTtCGGAAAAtTGAttAATAAGAAGtATtTGttCGttttTGCGGGTCGtAGAGtTTCGCGAGGtTttCGTGAGGGGCGGGGtCGGAAGGTGGGCGGGGtCGttAGtAtTtTttCGtAAGTGAGAGAAGAGGGGCGGGGTAGAGTGtCGAAAGGGCGGGGttttATttTGAAGtAAGttAAtttCGGGttttTGAGAGAGTtTGGTTGtTAGGCG…	534
Polr2k	B1_210	TGTTTGTTTTGGGTTTTTTTTGTAT	AAAACTCCCTACCTCCACAACTAA	TGttTGTtTTGGGTTttTttTGTATtTGttATTAtAtAAGtAtAAAttTTCGAATGtCGAGtTGTGGAGATGTTTTGtTAttttAGAGAGAAGGGtAAATAAAAAtAAAAtAAAAttttAtAGGAAGtAGGTAGGAGAAAAACGtTGTAAttTGttTtAGAAAtAGAAGCGttAGTtttttCGtAtTGCGAGGGAGAGGGGGCGGGGtTTCGTTTCGTtATAAATCGGCGtCGGAAGTTGGCGAGGtAGCGtCGGAAAAAGtTTTTGCGTGtTtAGAGAAGGGACGtTTtTTttAGtTGTGGAGGTAGGGAGTtTt	316
Cyb5r2	B1_019	TTATTGTTTTAATTAGTTGGGAAAT	AAAATCTTAAAAATAAACCCCATTC	ttAtTGTtttAAttAGtTGGGAAAtCGttCGTGAATttTGttTCGGttAtCGttTGCGGtTGTTCGttTAGtttCGGGTTttTTttTGtttCGCGtTTTttCGGtAGAAtTtAttTGGAGCGAGATGttTGAtTTATttTCGAGATGAAtAGTGttTTTGATGGTGGGGATGATGAAAtATtCGGtAGTGGtCGtTGAGGAGtTGAtTttTGttttATAGCGACGGATTCGAGtTTtTGTGTtAtATGAtTtTGGtAtAGGAtTAGttTGGCGtTTtTGtAGtTGGtCGGGTGGGAATGGGGtTTATtTttAAGATttt	319
BC028265	B1_211	GGAAGTTTTTTTAATTGATTTGTGG	TCTCCAAATCAACAACTTCCTATCT	GGAAGTttTTttAATTGATTTGTGGGAAATGTAGTttCGGttttTGTGACGGtATtAGAAAGTGtTGTtAGtATtAAATTTttATATTtTTTCGTtAAAGGTCGtTTtTtAAATTTGTGtAGTTGTttTGTTGAGCGtTGtATTTGGATTTtTGAtATGGAGGTTGGTGtAGGGAAtAGtAttATtTTGtAGATATGAGGGAtTGTGtAGGGTGGCGGGTAGGGtACGGAGAGTGtCGGtTTGGGtTTGTTGTGAGAtAGGAAGtTGtTGAttTGGAGA	279
Atl3	B1_212	TTTTTTGTAAGGTTTAATGGGAGTTG	TAAAACCTCCTCCTTCAACAAAAATA	ttTTTGtAAGGttTAATGGGAGTTGTAGTTtAGCGGTAGGAAGAtttAtTCGGtttAGTttTGTttTtCGTTTttTtTACGtttCGGATGAGGGCGAAtAttCGGGTtAGAGGGGtCGGGtttAAGAAAACGtCGAAtTAtAATTttCGATGGAttCGAtATTttAGTACGtAGTtAtAGGTAttCGCGGtACGATtttCGtTtCGGCGtACGCGtAtCGAACGGTGGCGGGAtTCGGtCGCGTGCGtTTTttCGtttTCGTtACGtttTGCGttATCGGtAGGGtTGTtTttTGAGtTGTAGGtTTTtTtCGCGCGttttTttTTtTCGGTTTtTttttAAGTttAGGtTtCGttTGTTTtttTttTttAGGGtAGttTtAAttCGtTttTGTtTTtT…	435
2810012G03Rik	B1_046	AGATTTGGTAGTTAGAAGAGGGGTT	TAAACAAACCCAATTAAAAACATATC	AGATtTGGtAGtTAGAAGAGGGGtTtCGGtTAtTtAGAGtAGGttTTGAtCGGCGtTTGGAtTAtATTTtttAGtAGttTTtACGtCGAGGATtAGTttTTGtCGGGGGAAGGTGGGGGGATGtTTGtAGAAAGGTGGtTGTGTCGGAAGGGAAAGGAGGttAGGTGAGAAGAtTGTGGtTAATATTGTTTCGTGGttTGAGtTGAGTtAGATAGTTtAGTTGGGAGGATGGTTTAGTGGAAGGAGTGGAtAATGGtTTTGTTTAttTTTATtCGAtATGGtTTttttTACGGGtTTCGTGATATGtTTttAAtTGGGttTGTttA	326
Eif3s8	B1_028	TTGTAGATTTGGAGGTTTTAAGAGTT	CCTAATAAACAACCAATCAATCTTAATTTA	tTGtAGAtTTGGAGGttTTAAGAGtTGATGtAATAtTAAGtAACGGAAAAttTtTttTttTttTCGGTAtCGAGGACGtCGAGGGtTtttttAGtTCGtTGCGAGAGtTttTTTtTtAGACGCGtttAGtttATGGtTtCGtTCGtttAttCGAGttttCGtAGttCGttAAAttCGTttttTtCGCGtttttAGtTtAtTGTTTGtCGTAGTTttCGGAGAtCGGTTTGGTGACGAGtTttTtttCGGAtAGGGACGAtTtCGAtTtAtTGTtCGAGtCGGTGGTGAAGAATCGCGAtATGGCGACGGCGtTGAAGGGtTGAGGCGtTCGCGGtCGGAAttTGAGGAAAttCGCGGCGTtAGGGTTTGGGGGtAAtCGCGGtTAttATtTttCGAttC…	680
Atrx	B1_213	TTTAAGTTTTAGTTGGGGTTTTTTAT	ATAACTACTAAAATCCCAATACTTTTC	tttAAGttttAGtTGGGGtTTtttAtCGCGtTtttttAGtttCGtTtAttTAGAGGGAAAACGATGtCGtTGAtCGCGAAGtCGCGCGCGGGttTAGGGtAttTAGCGtACGTtTTTGtAAAtAttttAtTCGAGTGGAAGGCGttCGGGAGtAGAACGtCGGGGttCGTGAtAAGGGtTTGCGTTTTAttTtATGGGtTtAGCGGTtATGTTTTTGGtTCGGACGGtCGtTTGGtTTGGtAAttttTTGGGTAtCGTTtTGCGtTttTCGGCGttAGTGGtTGAACGAAAAGTAtTGGGATtTTAGTAGTtAt	314
BC023829	B1_052	TTGAAAGAGGTTTTTTAGGTTTATG	TATAACATCCACCCAATCAATATTC	tTGAAAGAGGttttTtAGGTTtATGGCGGAGAAtTTCGtCGAGGCGTttTttTtTTtttttCGtttttCGCGtCGCGAAGttTGCGttTtAtAGCGGGTTtATGtTGttAAAGGtAGtTTCGTCGtTAACGtCGtCGttAGGAGAAAttAGAGtAAttAAtTGTtTtttAtAtTttTTtCGGtTTtCGTAGtTAGGATGCGtATGCGtTtTGAGAttCGtTtttTGtTTtttttAtttttAtAtttttTtCGttttAGtTCGTtAGAAGtAGGAGGTTAtATTGATAGTGGATtTTTTTGtTtCGGGGTAttAGttTGttTGttTtTGGGAtAGAATtTtTAtAAAAAGAAGAGGGGAACGTtCGGGGAGGGGAAtAtTGAtTGGGTGGATGTtATA	397
Nid1	B1_214	TTGTGGGATTATAGTTGGGAAATAT	CCCCTCACTAAAACAACTAACACTC	TTGTGGGAttAtAGTTGGGAAAtATGtTGGACGCGAGCGGtTGTAGTTGGGCGATGTGGACGTGGGCGtTGTTGtAGtTGtTGtTAtTAGTGGGGttCGGAGGtTGttTGAATCGttAGGAGtTtTTttttTTCGGtttTGGGtAGGGGGAttTAGAGtTGGAGGtCGGGGACGACGTKGTATtttttTtttTGGAAtTGATCGGAGAAtTGAGtTTtTATGATCGTACGGAtATtACGTCGGTtTATGTGAGTTGGGGtCGGGAGGGGAGGAAGGttAGGtTATGtTGGGGTCGttAGTttAGAGAGAtAGATGTGGAAtTTGGGCGTCGtttTtCGGGAttCGAGTGtTAGtTGTtttAGTGAGGGG	369
Ubxd8	B1_215	TATTGATTTTTTGGGGTTTGTTATT	AACCCCAACCTAAAAATAATTTTAC	tAtTGAtttTtTGGGGTtTGTtATtTTTTtATtAATTTTAGATtTTTGGGAGATAGATCGGtAGGGTttTGAATTGTTCGGttTAGAtACGCGAACGTCGtttTtTGGTGGCGAGATTCGGAAGGGGGCGGGGAGGGTGttCGCGAGTTAGCGCGCGtAGACGtAGTTGAGTttCGGCGGCGGTTtAGGtCGGAAGTGGTTAtAttTGAGATtAtTTtCGGCGGGTGACGGTGCGGACGGGTtAGGAGCGTAGAGGCGGCGGtAAAATGGCGGCGttTGAGGAGtAGGATtTAAtTtAGGAGtAGAtCGAGAAGtTGtTGtAGTTTtAGGTAGtAGCGAGTTtTCGGTGtAGtttAGGtCGtCGCGGGATGGGGAGTGGGAtttTAGAGGAGCGtAAAA…	418
Trrap	B1_216	AGGAGTTTTTTTAAATTAGATTAGTTATAT	AAAACCAAACCTAACTTCTCCCTAAA	AGGAGtttTttTAAAtTAGATtAGttAtAtTGtAGtATTTAGTttTtCGCGGCGtCGGGtTGCGtTGGAGCGGATGGAGGGACGCGtAGCGtTAGCGGtCGCGGAGGTTGGtttTCGGCGtTTGtCGTAGtTtAGCGGttTGtTGGGGGGtAGTCGtTGAGAGTttCGGGAAGGATCGGCGAtAAAAGGAGGGAAttCGAAGGtCGTTTGCGACGCGAAGGGATTGAGTGAGGAGTCGAGGGGGtTGCGGtAttttAttAAAGttATttTGGtATtTGCGGGttTttACGtAGGtTttTGGtTtTtTGGGttAGACGtTGAGAGTGAAGGTAGCGGCGGtTACGGCGtttttTGGCGGttCGGAGGCGCGTTGTttAGttAGtCGGGCGTCGTGGGCGG…	600
Mbtps2	B1_059	TTTGAGGTTTTTATTTTTAATATTAAGT	ATCAAACCTCATAAATCACAAACAC	ttTGAGGtttTtAttTTtAAtAttAAGTCGGttAGGTAGACGGtAGTttAAttAtttAttAttAttAttAGtAGCGAtAtCGGAATtATCGTAGCGACGGATGGACGGCGGGtttCGGCGGttTGtTTtTGCGAGttttAGTtAGtCGTGCGttCGttCGGAGttTTttAGtTttAGtATtCGCGtAGGAAtTAAAGTGtTAtCGGGTTtTTTGtTtCGGTGGtAAtATTTtttTtCGGAtttTTtCGGTGAGGAtAtTtAGtCGTTTTTTTTTTTTTTTTTTTTTTTTTGTTTTGTTTTGTTTTTTTTTTTTTTTTGGTGtATATGtCGGAAAAAGCGCGCGGGtTTtTTTTttTGGGACGtTCGGGtTtCGGAATGtTCGAAGtTCGGGTCGTtCGT…	432
